# Supplementary material
Source: PubMed Central journal article supplement (PMC4088349)
Supplement: Supp_Figure2.pdf [file Supp_Figure2.pdf]

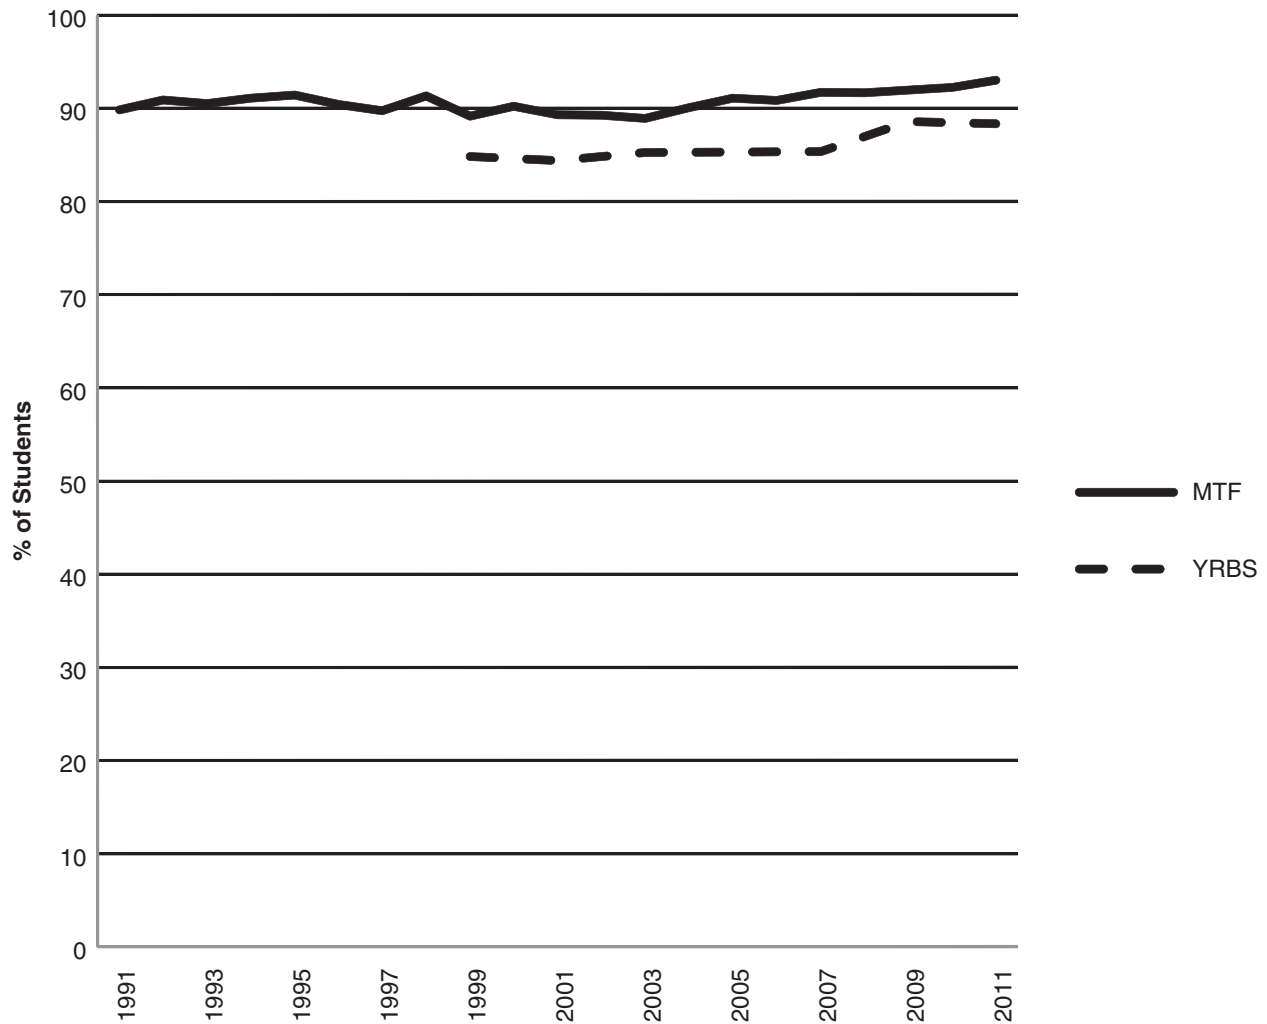

**SUPPLEMENTARY FIG. 2.** Trends in fruit consumption prevalence among US high school students, 2009–2010. MTF, Monitoring the Future. Data obtained from 10th- and 12th-grade students in 2010. YRBS, Youth Risk Behavior Survey. Data obtained from 9th–12th-grade students in 2009. Fruit consumption defined as: MTF, percentage of 10th- and 12th-grade students reporting eating fruit sometimes/most days/nearly every day/every day; YRBS, percentage of 9th–12th-grade students reporting eating fruit in the past 7 days.
