# Supplementary material
Source: PubMed Central journal article supplement (PMC4088349)
Supplement: Supp_Table1.pdf [file Supp_Table1.pdf]

## Supplementary Table 1. Differences in Secondary Student Daily Fruit and Green Vegetable Consumption Prevalence by Race/Ethnicity and Socioeconomic Status, 2008–2012

|                                          | Middle school <sup>a</sup> |             |                    |              | High school <sup>b</sup> |             |                    |              |
|------------------------------------------|----------------------------|-------------|--------------------|--------------|--------------------------|-------------|--------------------|--------------|
|                                          | %                          | OR          | (95% CI)           | p value      | %                        | OR          | (95% CI)           | p value      |
| <b>Daily fruit consumption</b>           |                            |             |                    |              |                          |             |                    |              |
| Race/ethnicity                           |                            |             |                    |              |                          |             |                    |              |
| White                                    | 37.3                       | (ref)       |                    |              | 27.2                     | (ref)       |                    |              |
| African American                         | 29.6                       | <b>0.71</b> | <b>(0.59–0.84)</b> | <b>0.000</b> | 20.8                     | <b>0.70</b> | <b>(0.60–0.82)</b> | <b>0.000</b> |
| Hispanic                                 | 32.3                       | <b>0.80</b> | <b>(0.70–0.92)</b> | <b>0.002</b> | 23.2                     | <b>0.81</b> | <b>(0.71–0.92)</b> | <b>0.001</b> |
| Other                                    | 38.2                       | 1.04        | (0.91–1.19)        | 0.590        | 28.2                     | 1.05        | (0.94–1.17)        | 0.402        |
| Socioeconomic status <sup>c</sup>        |                            |             |                    |              |                          |             |                    |              |
| High SES                                 | 43.6                       | (ref)       |                    |              | 35.2                     | (ref)       |                    |              |
| Mid SES                                  | 32.9                       | <b>0.63</b> | <b>(0.56–0.72)</b> | <b>0.000</b> | 22.3                     | <b>0.53</b> | <b>(0.48–0.58)</b> | <b>0.000</b> |
| Low SES                                  | 29.4                       | <b>0.54</b> | <b>(0.45–0.64)</b> | <b>0.000</b> | 21.6                     | <b>0.51</b> | <b>(0.44–0.58)</b> | <b>0.000</b> |
| <b>Daily green vegetable consumption</b> |                            |             |                    |              |                          |             |                    |              |
| Race/ethnicity                           |                            |             |                    |              |                          |             |                    |              |
| White                                    | 27.9                       | (ref)       |                    |              | 22.6                     | (ref)       |                    |              |
| African American                         | 19.3                       | <b>0.62</b> | <b>(0.51–0.75)</b> | <b>0.000</b> | 14.1                     | <b>0.56</b> | <b>(0.47–0.67)</b> | <b>0.000</b> |
| Hispanic                                 | 16.5                       | <b>0.51</b> | <b>(0.43–0.60)</b> | <b>0.000</b> | 15.5                     | <b>0.63</b> | <b>(0.55–0.72)</b> | <b>0.000</b> |
| Other                                    | 30.0                       | 1.11        | (0.97–1.26)        | 0.120        | 23.4                     | 1.05        | (0.92–1.19)        | 0.501        |
| Socioeconomic status                     |                            |             |                    |              |                          |             |                    |              |
| High SES                                 | 32.7                       | (ref)       |                    |              | 28.8                     | (ref)       |                    |              |
| Mid SES                                  | 23.5                       | <b>0.63</b> | <b>(0.55–0.72)</b> | <b>0.000</b> | 18.3                     | <b>0.55</b> | <b>(0.50–0.61)</b> | <b>0.000</b> |
| Low SES                                  | 17.9                       | <b>0.45</b> | <b>(0.37–0.55)</b> | <b>0.000</b> | 14.7                     | <b>0.43</b> | <b>(0.37–0.49)</b> | <b>0.000</b> |

Daily consumption prevalence defined as every day versus other. Overall Ns (unweighted) for middle school ranged from 9036 to 10,204 and for high school ranged from 17,732 to 18,846. Bold font indicates statistical significance ( $p < 0.01$  or less).

<sup>a</sup>Middle school=grade 8.

<sup>b</sup>High school=grades 10 and 12.

<sup>c</sup>Socioeconomic status (SES) indicated by average parental education (missing data on one parent allowed). Parental education measured on a scale ranging from 1 (completed grade school or less) to 6 (graduate or professional school after college). Low SES defined as average parental education values of 1.0–2.5, mid SES as 3.0–4.5, and high SES as 5.0–6.0.

OR, unadjusted odds ratio; CI, confidence interval.
